# Supplementary material for: Activation of transient receptor potential vanilloid 4 protects articular cartilage against IL-1β-induced inflammatory responses by regulating the CaMKK/AMPK/NF-κB signaling pathway
Source: Research Square preprint supplement (doi:10.21203/rs.3.rs-453677/v1), 2021-04-28
Supplement: Supplementary file 1 [file 672b5b3b9a9785dfb4b39b58.pdf]

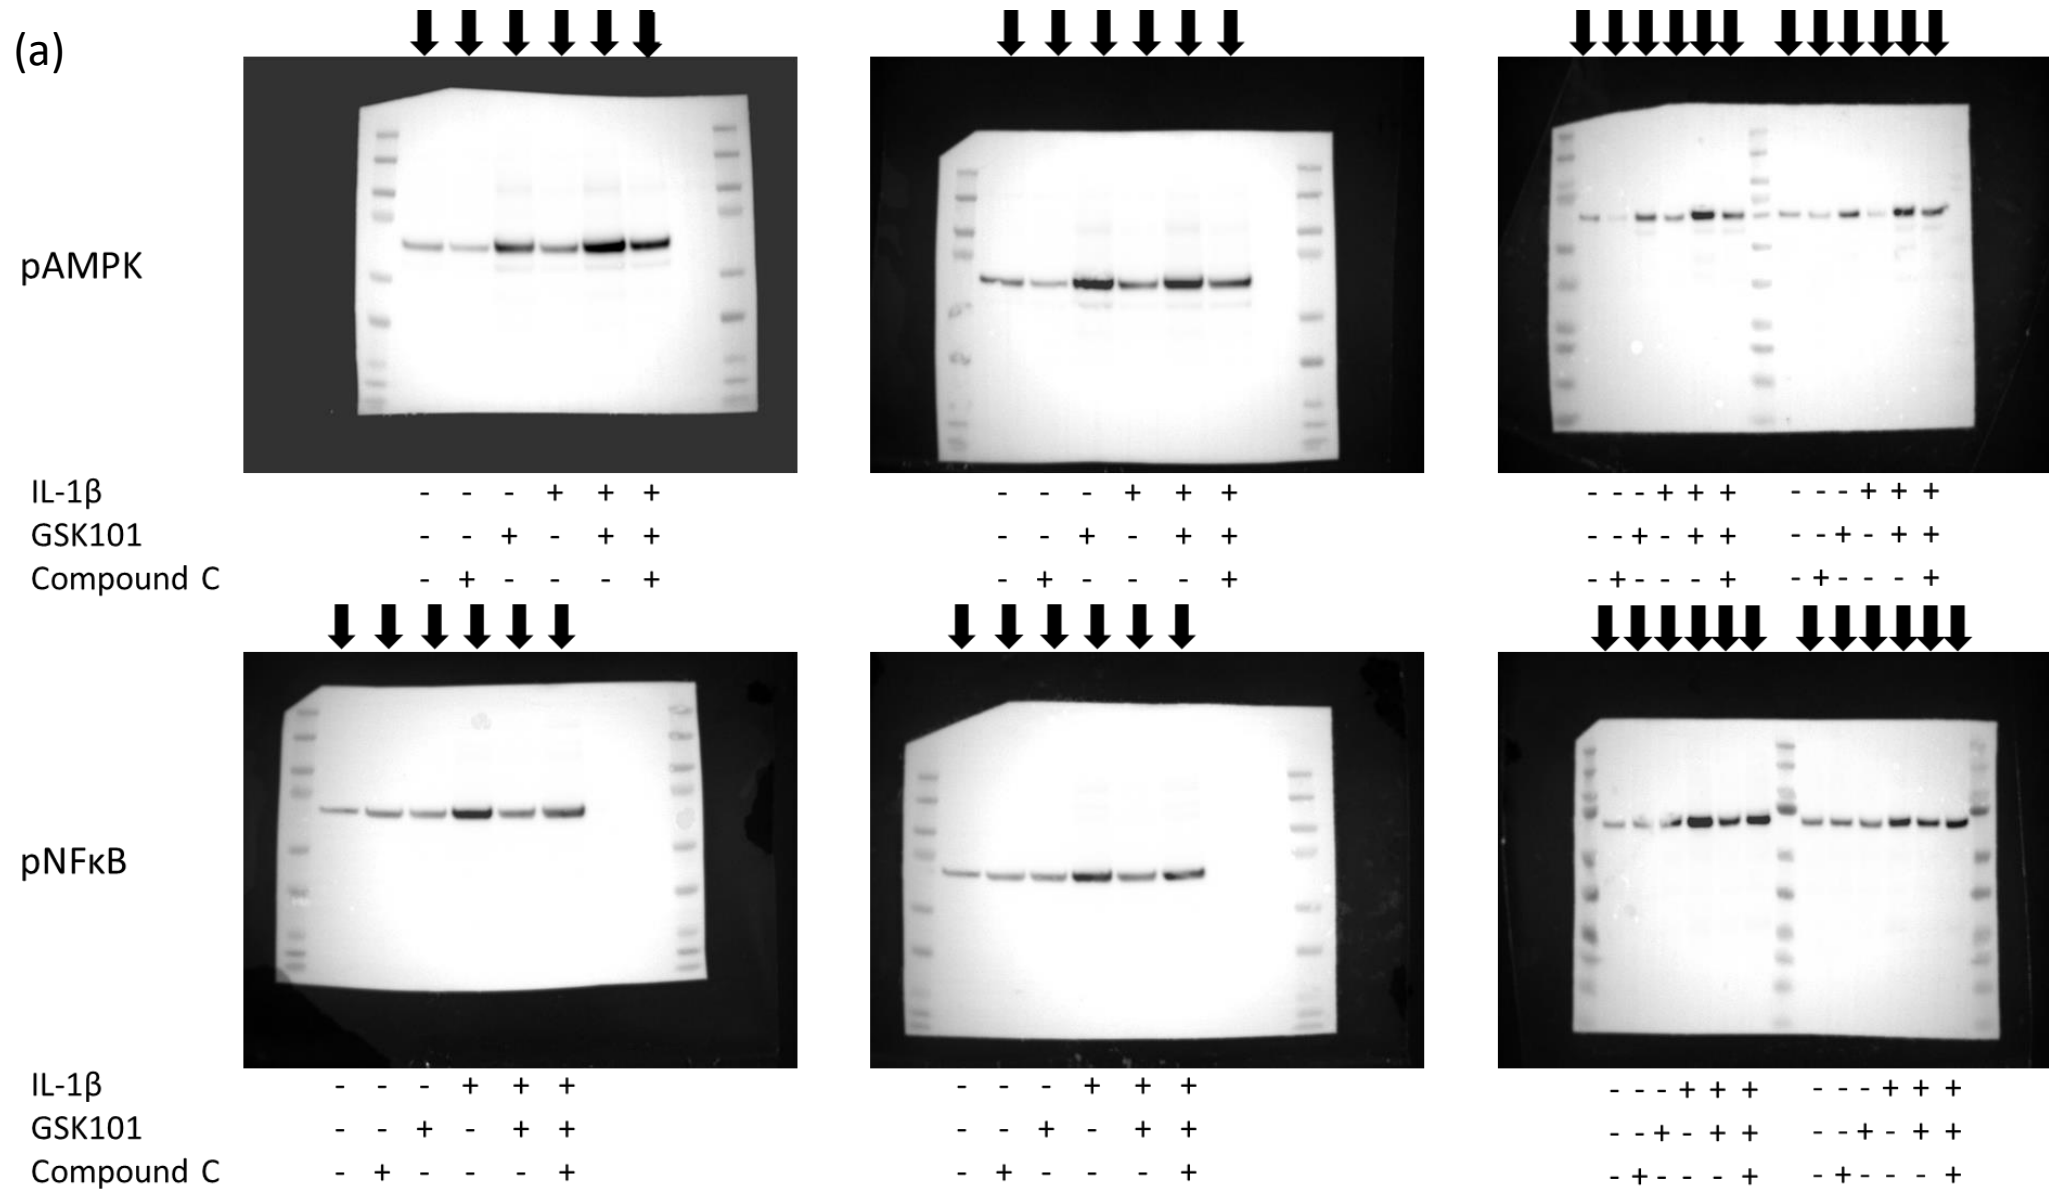

Supplementary Figure 2. All membranes of pAMPK and pNF $\kappa$ B of Western blot analysis in BACs treated with IL-1 $\beta$ , GSK101 and (a) Compound C and (b) STO-609.

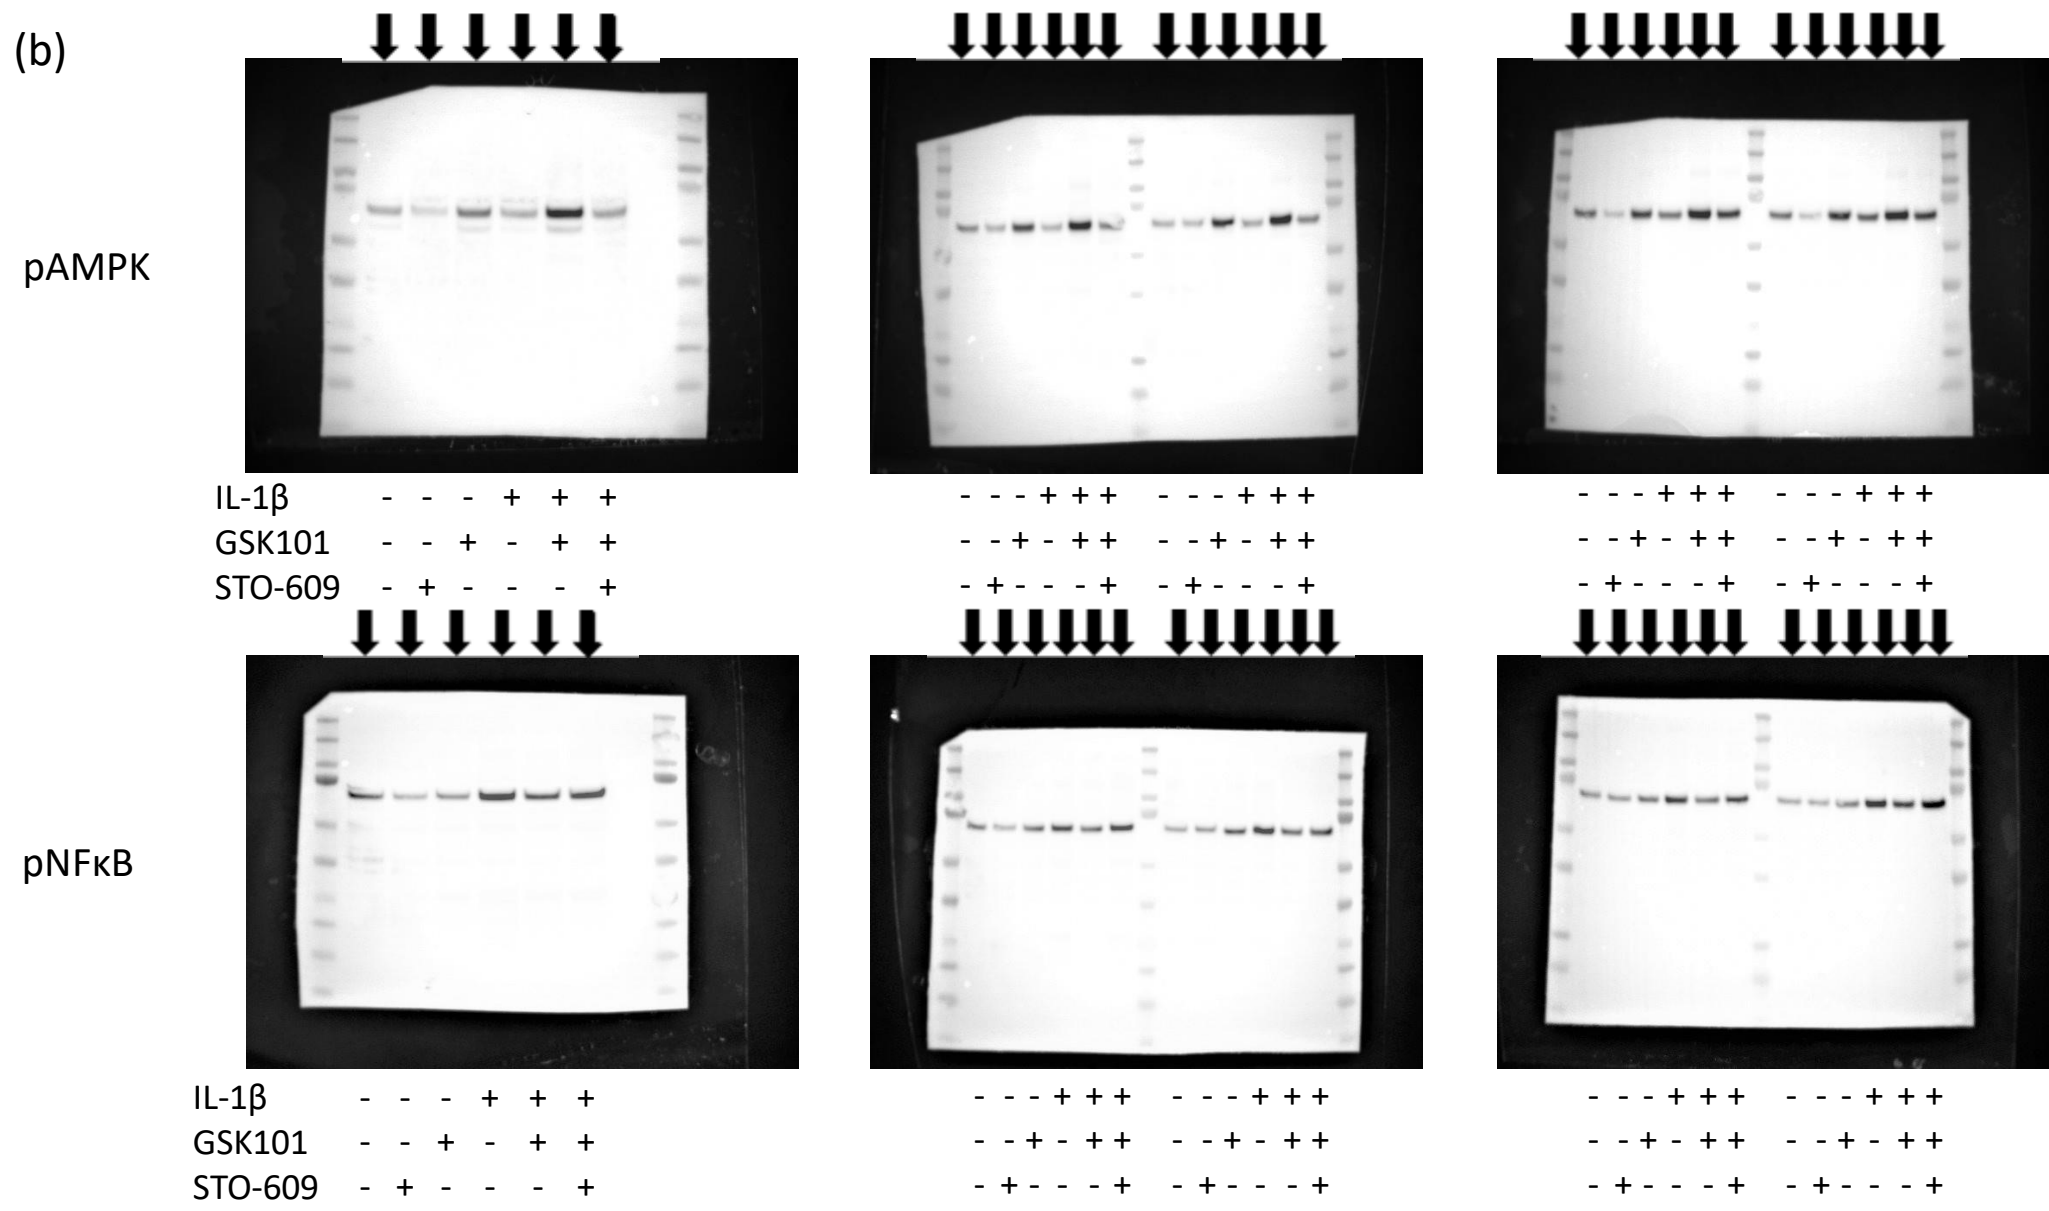

Supplementary Figure 2. All membranes of pAMPK and pNF $\kappa$ B of Western blot analysis in BACs treated with IL-1 $\beta$ , GSK101 and (a) Compound C and (b) STO-609.
